# Supplementary material
Source: Research Square preprint supplement (doi:10.21203/rs.3.rs-9459553/v1)
Supplement: Supplementary file 1 [file 297afddeca8d0f2deac543aa.docx]

**CARE Checklist – 2016: Information for writing a case report**

**Topic Item Checklist item description Line/Page**

**Title 1** The words “case report” should be in the title along with the area of focus1

**Key Words 2** Four to seven key words—include “case report” as one of the key words 2

**Abstract 3a** Background: What does this case report add to the medical literature? 2

**3b** Case summary: chief complaint, diagnoses, interventions, and outcomes 2

**3c** Conclusion: What is the main “take-away” lesson from this case? 2

**Introduction 4** The current standard of careand contributions of this case—with references (1-2 paragraphs) 3

**Timeline 5** Information from this case report organized into a timeline (table or figure) NA

**Patient Information 6a** De-identified demographic and other patient or client specific information 3,4

**6b** Chief complaint—what prompted this visit? 3,4

**6c** Relevant history including past interventions and outcomes 3,4

**Physical Exam 7** Relevant physical examination findings 4

**Diagnostic 8a** Evaluations such assurveys, laboratory testing, imaging, etc. 4

**Assessment 8b** Diagnostic reasoning including other diagnoses considered and challenges 4

**8c** Consider tables or figures linking assessment, diagnosesand interventions NA

**8d** Prognostic characteristicswhere applicable NA

**Interventions 9a** Types such as life-style recommendations, treatments, medications, surgery 4

**9b** Intervention administration such as dosage, frequency and duration 4

**9c** Note changes in intervention with explanation NA

**9d** Other concurrent interventions NA

**Follow-up and 10a** Clinicianassessment (and patient or client assessed outcomes when appropriate) 4

**Outcomes 10b** Important follow-up diagnostic evaluations 4

**10c** Assessment of intervention adherence and tolerability, including adverse events NA

**Discussion 11a** Strengths and limitations in your approach to this case 5

**11b** Specifyhow this case report informs practice or Clinical Practice Guidelines (CPG) 5

**11c** How does this case report suggest a testable hypothesis? NA

**11d** Conclusions and rationale 5

**Patient Perspective 12** When appropriate include the assessmentof the patient or client on this episode of care NA

**Informed Consent 13** Informed consentfrom the person who is the subject of this case report is required by most journals

**Additional Information 14** Acknowledgement section; Competing Interests; IRB approval when required 6
